# Supplementary material for: ICT-Enabled Mobile Work: Challenges and Opportunities for Occupational Health and Safety Systems
Source: MDPI journal article supplement (doi:10.3390/ijerph17207498), 2020-10-15
Supplement: s1 [file s1]

Supplementary

Table S1. Cross-table for calculation of Cohen’s Kappa.

|         |     | Rater 1 |    | Sum | %  |
|---------|-----|---------|----|-----|----|
|         |     | 0       | 1  |     |    |
| Rater 2 | 0   | 12      | 1  | 13  | 26 |
|         | 1   | 22      | 15 | 37  | 74 |
|         | Sum | 34      | 16 |     |    |
|         |     | %       | 68 | 32  |    |

**Table S2.** Research projects referring to new ways of work within the project line analyzed.

| Acronym     | Title <sup>1</sup>                                                                            | Research Goals <sup>3</sup>                                                                                                                                                                                                                                                                                                                                                                                                                                                                                                                                                                                                                                                                                     | Weblink                                                                                                                           | Duration                 | Mobile Work (yes/no) |
|-------------|-----------------------------------------------------------------------------------------------|-----------------------------------------------------------------------------------------------------------------------------------------------------------------------------------------------------------------------------------------------------------------------------------------------------------------------------------------------------------------------------------------------------------------------------------------------------------------------------------------------------------------------------------------------------------------------------------------------------------------------------------------------------------------------------------------------------------------|-----------------------------------------------------------------------------------------------------------------------------------|--------------------------|----------------------|
| Cloud-Crowd | Cloud and Crowd as a challenge—sustainable design of new organizational concepts for services | <ul style="list-style-type: none"> <li>Development of cloud and crowd based organizational concepts for the design, provision and distribution of services.</li> </ul>                                                                                                                                                                                                                                                                                                                                                                                                                                                                                                                                          | <a href="http://cloud-und-crowd.de/">http://cloud-und-crowd.de/</a>                                                               | 12/15–06/19              | n                    |
| CollaboTeam | Collaborative team-and project-work                                                           | <ul style="list-style-type: none"> <li>development of exemplary, holistic design concepts focusing on the connection between collaboration software and work design</li> <li>Testing of the concepts in four application areas (software development, IT services, mechanical engineering, and logistics)</li> </ul>                                                                                                                                                                                                                                                                                                                                                                                            | <a href="http://www.collaboteam.de">http://www.collaboteam.de</a>                                                                 | 02/17–10/20 <sup>1</sup> | y                    |
| COVID19-LL  | COVID-19 Lessons Learned                                                                      | <ul style="list-style-type: none"> <li>systematic and supra-regional collection and supply of Best Practice examples for new ways of work resulting from the COVID-19-related measures taken in different industries</li> </ul>                                                                                                                                                                                                                                                                                                                                                                                                                                                                                 | <a href="https://www.mw.tum.de/lfe/forschung/projekte/covid-19-ll/">https://www.mw.tum.de/lfe/forschung/projekte/covid-19-ll/</a> | 06/20–05/21              | n                    |
| diGAP       | Good agile project work                                                                       | <ul style="list-style-type: none"> <li>examining components of agile project work that prove to be particularly contradictory and endanger the success of the project</li> <li>development and testing of digital working models and training concepts for good agile project work, which will be integrated into company processes at the partner companies</li> <li>these models are supposed to support agile teams regarding their work organization across site boundaries as well as regarding workforce representation</li> </ul>                                                                                                                                                                        | <a href="https://gute-agile-projektarbeit.de/">https://gute-agile-projektarbeit.de/</a>                                           | 04/17–12/20              | y                    |
| EdA         | Empowerment in the digital world of work                                                      | <ul style="list-style-type: none"> <li>Development, testing and evaluation of sustainable design concepts for the transition to digital transformation in pilot projects</li> <li>development and application of a model based on a reciprocal relationship between self-responsible employees and organizational conditions making appropriate empowerment possible</li> <li>seven central design fields: agile organizational concepts, new management cultures, health promotion, time sovereignty, team empowerment, participation &amp; co-determination, and crowd</li> <li>design concepts for strengthening empowerment in the digital working world are prepared for a broad range of users</li> </ul> | <a href="http://eda-projekt.de/">http://eda-projekt.de/</a>                                                                       | 01/17–12/20              | y                    |

|                           |                                                                    |                                                                                                                                                                                                                                                                                                                                                                                                                                                                                                                                                                                                             |                                                                                     |             |   |
|---------------------------|--------------------------------------------------------------------|-------------------------------------------------------------------------------------------------------------------------------------------------------------------------------------------------------------------------------------------------------------------------------------------------------------------------------------------------------------------------------------------------------------------------------------------------------------------------------------------------------------------------------------------------------------------------------------------------------------|-------------------------------------------------------------------------------------|-------------|---|
| eLLa4.0                   | sociodigital transformation towards excellent leadership and labor | <ul style="list-style-type: none"> <li>• building up interaction competence and enabling managers of socio-digital systems by developing qualification modules for different target groups</li> <li>• a training program "Excellent Socio-Digital Leadership" is developed and new learning worlds for the qualification of executives are being tested</li> </ul>                                                                                                                                                                                                                                          | <a href="https://ellaviernull.de/">https://ellaviernull.de/</a>                     | 09/19–08/22 | y |
| Hierda                    | Humanization of digital work by Cowork-Spaces                      | <ul style="list-style-type: none"> <li>• Development and testing of an innovative modularized organization, communication, and conflict management concept with various instruments for free and self-determined work in coworking spaces</li> <li>• Distribution of the modular system and guidelines for good practice in coworking spaces in digital and printed form.</li> </ul>                                                                                                                                                                                                                        | <a href="http://www.hierda.net">http://www.hierda.net</a>                           | 04/17–12/20 | n |
| MegA <sup>2</sup>         | Measures and recommendations for tomorrow's healthy work           | <ul style="list-style-type: none"> <li>• Development of a demographically sensitive HR and health management using conceptual and empirical research</li> <li>• Development of an integrative, prevention-oriented modular multiplier system especially addressed to SMEs</li> </ul>                                                                                                                                                                                                                                                                                                                        | <a href="http://www.gesundearbeit-mega.de">http://www.gesundearbeit-mega.de</a>     | 11/15–03/21 | n |
| Praegewelt                | Prevention-oriented design of the new world of work                | <ul style="list-style-type: none"> <li>• Development of new and healthy forms of work in the office</li> <li>• Investigation of interactions between work organization, work styles, corporate culture and individual behaviors in different Open Space constellations</li> <li>• Based on these results, working models for health-promoting open-space offices will be developed, implemented and subjected to a practical test with employees, managers and operational experts</li> <li>• Different design options for individual and constellation-specific open-space offices are provided</li> </ul> | <a href="http://www.praegewelt.de">http://www.praegewelt.de</a>                     | 01/16–07/19 | n |
| PraeVierNull <sup>2</sup> | Prevention 4.0                                                     | <ul style="list-style-type: none"> <li>• Development of concrete recommendations and guidelines for preventive work design in the world of work 4.0</li> </ul>                                                                                                                                                                                                                                                                                                                                                                                                                                              | <a href="http://www.praeventive-arbeit40.de">http://www.praeventive-arbeit40.de</a> | 12/15–04/19 | y |
| prentimo                  | Prevention-oriented design of mobile work                          | <ul style="list-style-type: none"> <li>• Designing mobile work to be safe, healthy, appropriate to the different phases of life and gender-sensitive in order to reduce stress for employees and to strengthen the employees' loyalty to the company in the long term</li> <li>• Four fields of action are being linked: mobility oriented work design, mobility-sensitive health promotion, preventive and reflective competence development and life-phase-oriented personnel management</li> </ul>                                                                                                       | <a href="http://www.prentimo.de">http://www.prentimo.de</a>                         | 01/16–07/19 | y |
| ReProNa                   | Reflexive project management for sustainable innovative work       | <ul style="list-style-type: none"> <li>• Development of management systems that produce salutogenic working and organizational conditions and that are constantly renewed under changing contextual conditions</li> <li>• Structures and processes in project work are being redesigned</li> <li>• Prevention is supposed to be based on the competence to design salutogenetic conditions in a contextually appropriate manner</li> </ul>                                                                                                                                                                  | <a href="http://reprona.de/">http://reprona.de/</a>                                 | 04/16–07/19 | y |

|         |                                                                                                                         |                                                                                                                                                                                                                                                                                                                                                                                                                                                                                                                                                                           |                                                                                                                                                                       |             |   |
|---------|-------------------------------------------------------------------------------------------------------------------------|---------------------------------------------------------------------------------------------------------------------------------------------------------------------------------------------------------------------------------------------------------------------------------------------------------------------------------------------------------------------------------------------------------------------------------------------------------------------------------------------------------------------------------------------------------------------------|-----------------------------------------------------------------------------------------------------------------------------------------------------------------------|-------------|---|
|         |                                                                                                                         | <ul style="list-style-type: none"> <li>• Project-specific burdens are analyzed, personal and organizational competences for coping with them are recorded</li> <li>• Development of instruments for evaluating the sustainability of company work organization</li> </ul>                                                                                                                                                                                                                                                                                                 |                                                                                                                                                                       |             |   |
| SANDRA  | Designing the future world of work by availability management                                                           | <ul style="list-style-type: none"> <li>• Development of solutions that improve the balance between work and private life, particularly regarding the accessibility of employees</li> <li>• Organizational, legal and technical requirements for the introduction and commissioning of an operational availability management system are analyzed</li> <li>• An availability manager was developed and tested with the company partners</li> </ul>                                                                                                                         | <a href="https://www.sandra-projekt.de">https://www.sandra-projekt.de</a>                                                                                             | 04/17–06/20 | y |
| SerWiss | Integrated design of business model and work for the international provision and commercialization of service-knowledge | <ul style="list-style-type: none"> <li>• Development of an integrated solution providing comprehensive support for service and maintenance staff in carrying out the processes</li> <li>• Technical (hardware and software) and business-oriented (business models and process design)</li> <li>• The Knowledge-Centered Service (KCS®) methodology, integrating the development and maintenance of knowledge into the problem-solving process, is being used</li> </ul>                                                                                                  | <a href="https://www.produktion-dienstleistung-arbeit.de/de/projekte.php?PN=11051562">https://www.produktion-dienstleistung-arbeit.de/de/projekte.php?PN=11051562</a> | 03/20–02/23 | n |
| SodA    | Autonomy in companies of a digitized world of work                                                                      | <ul style="list-style-type: none"> <li>• Development and testing of models and measures in order to combine a holistic, socio-technically oriented implementation of digital technology with autonomy-promoting work and organizational design</li> </ul>                                                                                                                                                                                                                                                                                                                 | <a href="http://www.soda-projekt.de/">http://www.soda-projekt.de/</a>                                                                                                 | 06/17–05/20 | n |
| teamIn  | Digital leadership and technologies for tomorrow's interaction in teams                                                 | <ul style="list-style-type: none"> <li>• Development of a mission statement for tomorrow's managers focusing on the growing demands of digitization</li> <li>• Development of new management and communication tools as well as organizational structures and concepts to support managers in this process</li> <li>• Creation of appropriate concepts for competence development</li> </ul>                                                                                                                                                                              | <a href="https://www.teamin-projekt.de">https://www.teamin-projekt.de</a>                                                                                             | 01/20–12/22 | y |
| vLead   | Resource-oriented and effective leadership models of digital project- and teamwork                                      | <ul style="list-style-type: none"> <li>• Development and testing of instruments for the resource-oriented and effective management of digital project and team work, especially for small and medium-sized enterprises (SMEs)</li> <li>• Results are summarized and published in the so-called vLead Toolbox that supports managers in identifying the requirements of digital work, supporting team processes with information technology, designing meetings and innovation processes in a participatory manner and developing competencies for project work</li> </ul> | <a href="http://www.vlead.de">http://www.vlead.de</a>                                                                                                                 | 04/17–12/20 | y |
| WiViTe  | Innovative knowledge spaces—transfer and generation of knowledge in virtual teams                                       | <ul style="list-style-type: none"> <li>• Investigation of how digital knowledge transfer and knowledge generation in virtual teams can be efficiently designed</li> </ul>                                                                                                                                                                                                                                                                                                                                                                                                 | <a href="https://www.produktion-dienstleistung-">https://www.produktion-dienstleistung-</a>                                                                           | 02/19–01/22 | y |

- 
- Development and testing of a new method for work organisation  
based on a digital platform to support the creation, transfer and networking  
of knowledge in virtual collaboration

[arbeit.de/de/projekte.php?PN  
= 11050913](http://arbeit.de/de/projekte.php?PN=11050913)

---

<sup>1</sup> in part author's translation; <sup>2</sup> accompanying research connecting joint projects and pursuing research questions activities on their own; <sup>3</sup> based on the short descriptions provided in the database of the project management agency.
